# Supplementary material for: Pharmacodynamics and molecular correlates of response to glofitamab in relapsed/refractory non-Hodgkin lymphoma
Source: PubMed Central journal article supplement — Blood Adv. 2022 Feb 4;6(3):1025–37. doi: 10.1182/bloodadvances.2021005954 (PMC8945294; doi:10.1182/bloodadvances.2021005954), 2022-02-04
Supplement: advancesADV2021005954-suppl1.pdf [file advancesADV2021005954-suppl1.pdf]

## Supplementary Materials

**Supplementary Table 1.**

| <b>CD8 effector vs exhausted</b> | <b>PD1 High</b> | <b>MYC Targets</b> | <b>TP53 Targets (cell cycle)</b> |
|----------------------------------|-----------------|--------------------|----------------------------------|
| ACOT8                            | CKS1B           | ANLN               | CDKN1A                           |
| ADAMTS6                          | MCM5            | ASPM               | GAS2L1                           |
| ADGRL2                           | CENPM           | AURKA              | HRAS                             |
| ADIPOQ                           | MCM3            | BIRC5              | JAG2                             |
| ADORA2A                          | MCM7            | BRCA2              | LTBP2                            |
| ADPRM                            | TK1             | BUB1               | NEDD9                            |
| AGR2                             | FEN1            | CCNB1              | SEPTIN9                          |
| AIF1L                            | UBE2T           | CCNB2              | SFN                              |
| ALOX5AP                          | TUBB            | CDK1               | TP53                             |
| ALS2                             | STMN1           | CDKN3              |                                  |
| AOPEP                            | NUSAP1          | CKS1B              |                                  |
| ARHGAP30                         | TROAP           | CKS2               |                                  |
| ARHGAP8                          | CHAF1A          | CLIC4              |                                  |
| ARL4C                            | TRAIP           | DCTPP1             |                                  |
| ATOX1                            | CDKN3           | DTL                |                                  |
| ATP8A1                           | NDC80           | E2F8               |                                  |
| B4GALT1                          | RNASEH2A        | ECT2               |                                  |
| BAK1                             | CENPA           | FAM136A            |                                  |
| BATF2                            | SMC2            | FDPS               |                                  |
| BBS4                             | SPAG5           | GMNN               |                                  |
| BCL2L14                          | CENPE           | GSDME              |                                  |
| BCL9L                            | CENPF           | HMGB2              |                                  |
| BEND6                            | RAD51AP1PLK4    | HMGN2              |                                  |
| C19orf12                         | KIF2C           | HNRNPLL            |                                  |
| C19orf53                         | UBE2C           | IDI1               |                                  |
| C1orf54                          | CHEK1           | KIF20A             |                                  |
| C3orf80                          | ZWINT           | KPNA2              |                                  |
| C9orf64                          | MTRF2           | MKI67              |                                  |
| CA2                              | CDCA5           | NUDCD2             |                                  |
| CASP7                            | RMI2            | NUP54              |                                  |
| CASS4                            | SPC24           | PCLAF              |                                  |
| CCDC12                           | CKAP2L          | PCNA               |                                  |
| CCND3                            | CDCA2           | PLK1               |                                  |
| CCRL2                            | ESCO2           | RACGAP1            |                                  |
| CD40                             | ECT2            | RRM1               |                                  |

|          |          |        |  |
|----------|----------|--------|--|
| CD86     | SKA1     | STRAP  |  |
| CDC42EP2 | SKA3     | TFDP1  |  |
| CESSA    | TPX2     | TOP2A  |  |
| CFAP126  | FOXM1    | TSPAN4 |  |
| CFAP36   | ORC6     | TXN    |  |
| CFAP410  | POLA2    | UBE2S  |  |
| CLCN1    | POC1A    | UCHL5  |  |
| CLEC6A   | ASPM     | YBX3   |  |
| COA5     | RACGAP1  |        |  |
| CSF1     | UHRF1    |        |  |
| CSF2     | HIST1H1B |        |  |
| CTSK     | HELLS    |        |  |
| CUEDC1   | HMMR     |        |  |
| D2HGDH   | BIRC5    |        |  |
| DAAM1    | INCENP   |        |  |
| DAPP1    | FAM111B  |        |  |
| DDX58    | KIF11    |        |  |
| DENND2B  | KIFC1    |        |  |
| DENR     | CENPW    |        |  |
| DHRS7    | MAD2L1   |        |  |
| DNAL1    | MCM2     |        |  |
| DOCK8    | MCM4     |        |  |
| DOK1     | MKI67    |        |  |
| DTX3L    | MTHFD1   |        |  |
| ENG      | MYBL2    |        |  |
| ENPP4    | NEK2     |        |  |
| EPSTI1   | GTSE1    |        |  |
| F11R     | DTL      |        |  |
| FAM209A  | GINS2    |        |  |
| FAM221A  | PLK1     |        |  |
| FCER1G   | POLE2    |        |  |
| FECH     | ANLN     |        |  |
| FRMD4A   | NCAPG2   |        |  |
| FXN      | SPDL1    |        |  |
| GBP2     | PARPBP   |        |  |
| GBP4     | FANCL    |        |  |
| GCH1     | CDCA8    |        |  |
| GCHFR    | CEP55    |        |  |
| GDI1     | CENPQ    |        |  |
| GMPPB    | FANCI    |        |  |
| GPR18    | HJURP    |        |  |

|          |          |  |  |
|----------|----------|--|--|
| GSAP     | MCM10    |  |  |
| GSDMD    | ASF1B    |  |  |
| GSN      | C1orf112 |  |  |
| GZMB     | PRR11    |  |  |
| HK1      | DEPDC1B  |  |  |
| HLA-B    | KIF15    |  |  |
| HLA-C    | SPC25    |  |  |
| HSPB11   | BARD1    |  |  |
| IDNK     | RAD51    |  |  |
| IFIT1    | RFC4     |  |  |
| IFITM3   | RRM2     |  |  |
| IFNG     | CLSPN    |  |  |
| IFT80    | NCAPG    |  |  |
| IKZF2    | STIL     |  |  |
| IL12A    | BRCA1    |  |  |
| IL12RB1  | BRCA2    |  |  |
| IL2RB    | AURKA    |  |  |
| IP6K1    | BUB1     |  |  |
| IRF1     | BUB1B    |  |  |
| IRF7     | TOP2A    |  |  |
| IRGM     | TTK      |  |  |
| ISG20    | TYMS     |  |  |
| ITM2B    | DSCC1    |  |  |
| ITPR1    | CENPU    |  |  |
| KIF13B   | SUV39H2  |  |  |
| LAMTOR4  | SHCBP1   |  |  |
| LGALS3BP | ATAD5    |  |  |
| LGALS9B  | DSN1     |  |  |
| LLGL1    | DIAPH3   |  |  |
| LYN      | CDC45    |  |  |
| LYST     | CDCA3    |  |  |
| MAF      | NUF2     |  |  |
| MCEMP1   | RAD54L   |  |  |
| MED15    | GGH      |  |  |
| MIDN     | CCNA2    |  |  |
| MPEG1    | TIMELESS |  |  |
| MYCBP2   | CCNF     |  |  |
| MZT2B    | PRC1     |  |  |
| NACC2    | PKMYT1   |  |  |
| NAGA     | CCNB2    |  |  |
| NBAS     | AURKB    |  |  |

|          |           |  |  |
|----------|-----------|--|--|
| NDUFA7   | KIF23     |  |  |
| NIT1     | DLGAP5    |  |  |
| NKG7     | ARHGAP11A |  |  |
| NOD1     | CDK1      |  |  |
| NQO2     | MELK      |  |  |
| NSG2     | CDC6      |  |  |
| NT5C3A   | CDC20     |  |  |
| OAS1     | DEPDC1    |  |  |
| OAS2     | KIF4A     |  |  |
| OAS3     | KIF14     |  |  |
| OCEL1    | POLQ      |  |  |
| P3H1     | E2F2      |  |  |
| PAGR1    | MND1      |  |  |
| PARP11   |           |  |  |
| PARP12   |           |  |  |
| PARP14   |           |  |  |
| PARP8    |           |  |  |
| PCBD1    |           |  |  |
| PDE1B    |           |  |  |
| PDE8A    |           |  |  |
| PDLIM4   |           |  |  |
| PLAC8    |           |  |  |
| PLSCR3   |           |  |  |
| PLXNA3   |           |  |  |
| PSMB8    |           |  |  |
| PSMB9    |           |  |  |
| PTK2     |           |  |  |
| RAB19    |           |  |  |
| RBM43    |           |  |  |
| RERE     |           |  |  |
| RGS12    |           |  |  |
| RIN1     |           |  |  |
| RSAD2    |           |  |  |
| SCLY     |           |  |  |
| SERPINB6 |           |  |  |
| SERPINB9 |           |  |  |
| SESTD1   |           |  |  |
| SGCB     |           |  |  |
| SH3BP2   |           |  |  |
| SIAE     |           |  |  |
| SIN3B    |           |  |  |

|          |  |  |  |
|----------|--|--|--|
| SLFN12L  |  |  |  |
| SOAT2    |  |  |  |
| SOCS1    |  |  |  |
| SPACA1   |  |  |  |
| SPATA13  |  |  |  |
| SQOR     |  |  |  |
| STAT1    |  |  |  |
| STMP1    |  |  |  |
| SUCO     |  |  |  |
| TALDO1   |  |  |  |
| TAPBP    |  |  |  |
| TAPBPL   |  |  |  |
| TBX21    |  |  |  |
| TFEC     |  |  |  |
| TLR4     |  |  |  |
| TMBIM6   |  |  |  |
| TMEM106A |  |  |  |
| TMEM140  |  |  |  |
| TMEM219  |  |  |  |
| TMEM87A  |  |  |  |
| TOR3A    |  |  |  |
| TP53BP1  |  |  |  |
| TRAF5    |  |  |  |
| TRAFD1   |  |  |  |
| TRIM5    |  |  |  |
| TSGA10   |  |  |  |
| TTYH3    |  |  |  |
| UBALD2   |  |  |  |
| UHRF1    |  |  |  |
| UMODL1   |  |  |  |
| UNC93B1  |  |  |  |
| VGLL4    |  |  |  |
| WLS      |  |  |  |
| XDH      |  |  |  |
| ZBP1     |  |  |  |
| ZCCHC18  |  |  |  |
| ZFYVE26  |  |  |  |
| ZNF23    |  |  |  |
| ZNF449   |  |  |  |
| ZNF513   |  |  |  |
| ZNF691   |  |  |  |

|       |  |  |  |
|-------|--|--|--|
| ZNFX1 |  |  |  |
|-------|--|--|--|

## Supplemental figures

**Supplementary Figure 1.** (A) Flow cytometric analysis of peripheral natural killer (NK) cells (CD16+/CD56+) and monocytes (CD14+) before obinutuzumab pretreatment (Gpt; C1D-7, predose) and before the first glofitamab infusion (C1D1, predose). (B) Graphs represent Log<sub>2</sub> fold change from baseline (C1D1 predose) of peripheral CD4+ T-cell subsets at indicated timepoints during cycle 1, as measured by flow cytometry. Error bars indicate confidence intervals. (C) Box plots (left) represent Log<sub>2</sub> fold change from baseline (C1D1 predose) of peripheral CD3+ T cells at 6 hours post-end of infusion (6H post-EOI) of cycle 2 day 1 (top) and cycle 5 day 1 (bottom) in relation to the best overall response (BOR), as measured by flow cytometry. Scatter plots (right) indicate the correlation between Log<sub>2</sub> fold change from baseline (C1D1 predose) of peripheral CD3+ T cells and the administered glofitamab dose (mg) at 6h post-EOI of cycle 2 day 1 (top) and cycle 5 day 1 (bottom). Colors indicate BOR categories. *P*-values >0.05 for complete response (CR) vs partial response/stable disease/progressive disease (PR/SD/PD). (D) Plots show Log<sub>2</sub> fold change from baseline (C1D1 predose) of peripheral CD8+ T-cell subsets measured by flow cytometry on the first day of cycle 4 (C4D1 predose; top panel; n = 37) and the first day of cycle 5 (C5D1 predose; bottom panel; n = 29) for the high dose cohort (4-25 mg). X-axes indicate the BOR. Means of each response category are shown. *P*-values >0.05 for CR vs PR/SD/PD. In panels (B and D) dotted lines indicate baseline levels and dashed lines indicate 2-fold change from baseline. Statistical analysis was not adjusted for log(glofitamab dose) and International Prognostic Index (IPI) category. Data in (A-C) are from n = 119 patients with evaluable flow cytometry data.

**A**

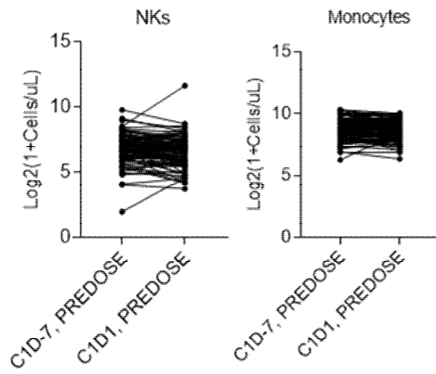

**B**

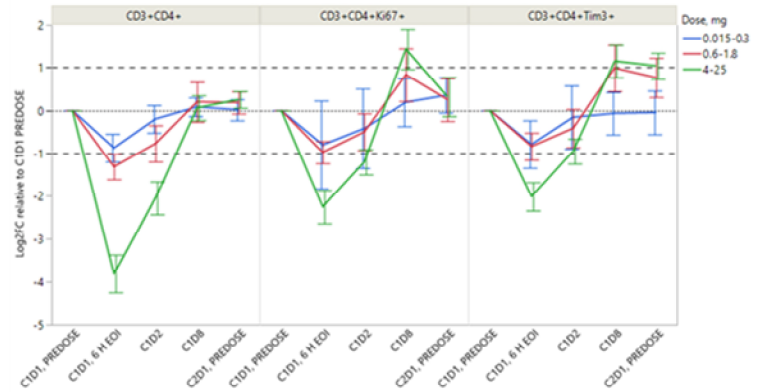

**C**

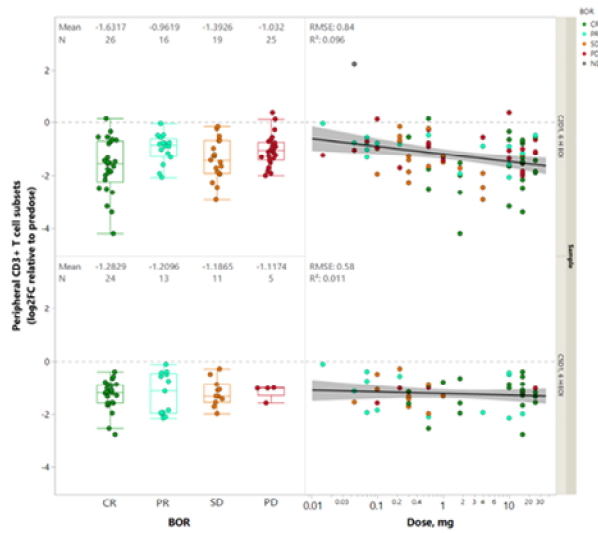

**D**

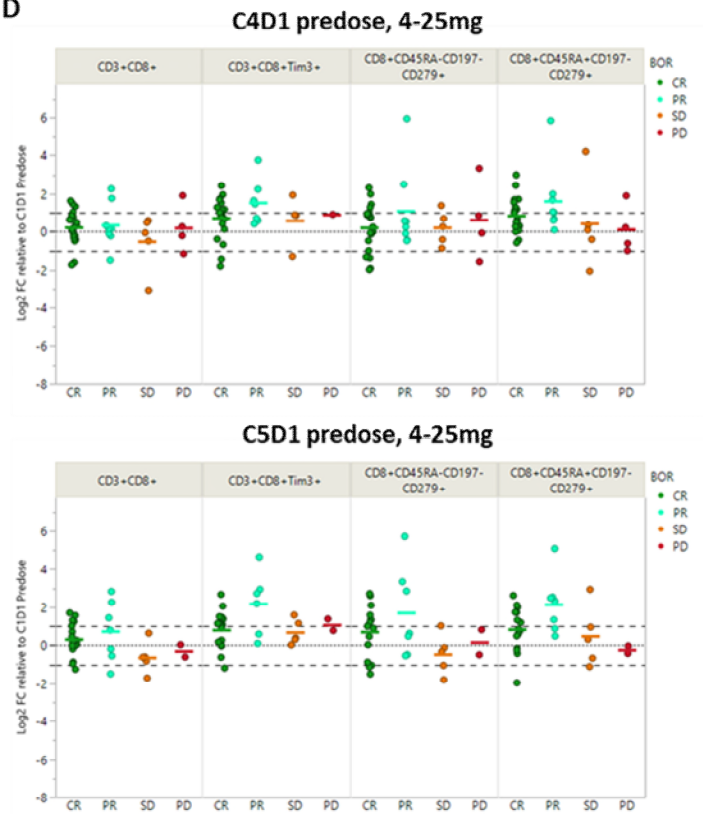

6H post-EOI, 6 hours post-end of infusion; BOR, best overall response; C, cycle; CR, complete response; D, day; NK, natural killer cells; PD, progressive disease; PR, partial response; SD, stable disease.



**Supplementary Figure 2.** (A) Plasma cytokine concentrations (pg/mL) of B-cell activating factor, IL-1 $\beta$ , IL-10, IL-15, IL-17, IL-8, MIP-1 $\beta$ , MCP1, soluble IL-2R (sCD25), TGF- $\beta$  and TNF- $\alpha$  are shown at indicated timepoints during the first cycle. (A) Plasma cytokine concentrations (pg/mL) of (B) IFN $\gamma$ , (C) IL-6, and (D) IL-2 are shown at indicated timepoints during cycles 1, 2 and 5. In panels (A-D), y-axes are in logarithmic scales and error bars indicate standard error of the mean. Data are generated from n = 119 patients with evaluable cytokine data.

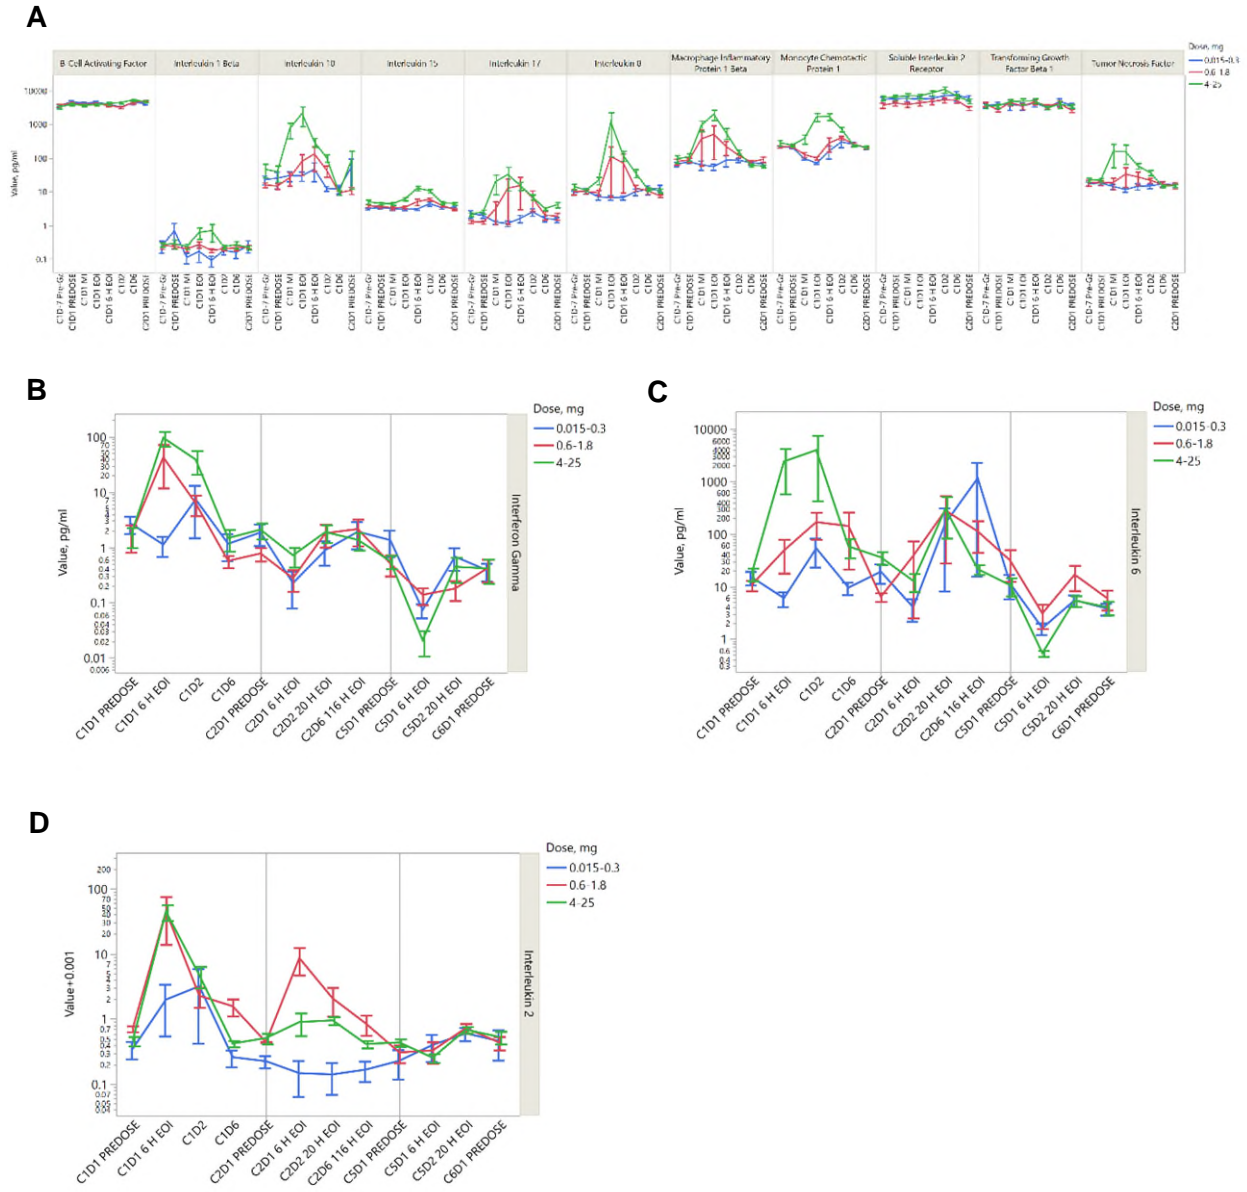

6H post-EOI, 6 hours post-end of infusion; BOR, best overall response; C, cycle; CR, complete response; D, day; MI, mid-infusion; NK, natural killer cells; PD, progressive disease; PR, partial response; pre-Gpt, before obinutuzumab pretreatment; SD, stable disease.

**Supplementary Figure 3.** Box plots demonstrate (A) percentage of total (CD8-) Ki67+ cells, (B) percentage of CD8+Ki67+ cells, and (C) percentage of CD8+Ki67- cells in

baseline tumor biopsies (n = 51) in relation to the best overall response (BOR)

categories. All fractions are shown as of total cells in the tumor area. *P*-values >0.05.

Statistical analyses in panels A-C were performed for complete response (CR) vs partial response/stable disease/progressive disease (PR/SD/PD) and adjusted for log

(glofitamab dose) and International Prognostic Index (IPI) category.

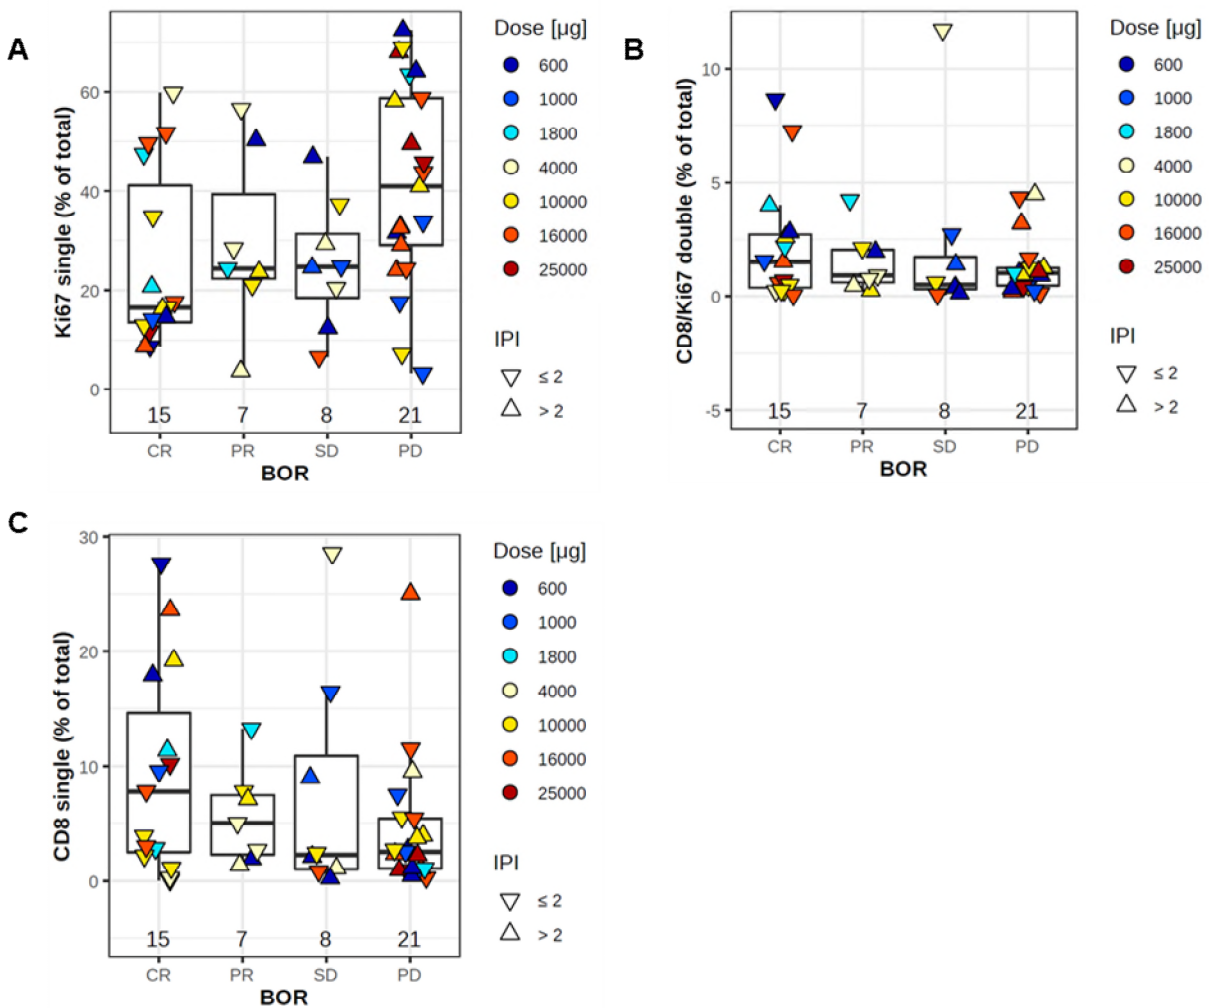

BOR, best overall response; CR, complete response; IPI, International Prognostic

Index; PD, progressive disease; PR, partial response; SD, stable disease.

**Supplementary Figure 4. Scatter plots show correlation between log (CD8A expression) (RNAseq) and (A) MYC targets or (B) TP53 targets signature scores in baseline biopsies.** (C) Table of identified *TP53* mutations in the mutant patient population, and (D) their schematic mapping on TP53 protein. LOF indicates loss-of-function. (E) Box plots represent the TP53 signature score (RNA-seq) for the *TP53* wild-type (WT) and mutant (mut) subsets. Asterisk denotes *P*-value <0.05. (F) Box plots represent the Log (CD8A expression) (RNA-seq) for the TP53 wild-type (WT) and mutant (mut) subsets. TP53 mutation data is generated from n = 33 patients with targeted sequencing data.

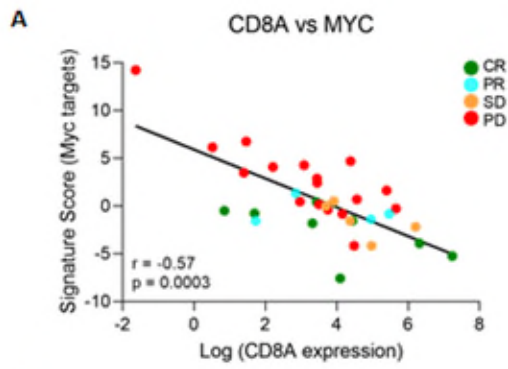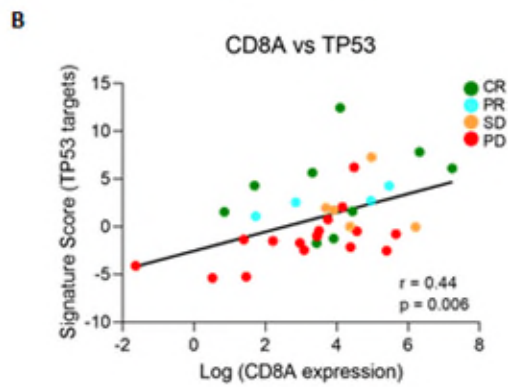

**C**

| Hugo_Symbol | Protein_Change       | Mutation_Type       | Biological_Effect | Frequency |
|-------------|----------------------|---------------------|-------------------|-----------|
| TP53        | R248Q                | Missense_Mutation   | LOF (likely)      | 2         |
| TP53        | T155_R156            | In_Frame_Del        | LOF (likely)      | 1         |
| TP53        | C176R                | Missense_Mutation   | LOF (likely)      | 1         |
| TP53        | C176Y                | Missense_Mutation   | LOF (likely)      | 1         |
| TP53        | C275Y                | Missense_Mutation   | LOF (likely)      | 1         |
| TP53        | I254S                | Missense_Mutation   | LOF (likely)      | 1         |
| TP53        | K132R                | Missense_Mutation   | LOF (likely)      | 1         |
| TP53        | L111R                | Missense_Mutation   | LOF (likely)      | 1         |
| TP53        | L194R                | Missense_Mutation   | LOF (likely)      | 1         |
| TP53        | M1K                  | Missense_Mutation   | LOF (likely)      | 1         |
| TP53        | N235D                | Missense_Mutation   | LOF (likely)      | 1         |
| TP53        | N239D                | Missense_Mutation   | LOF (likely)      | 1         |
| TP53        | N239S                | Missense_Mutation   | LOF (likely)      | 1         |
| TP53        | P278R                | Missense_Mutation   | LOF (likely)      | 1         |
| TP53        | R110L                | Missense_Mutation   | LOF (likely)      | 1         |
| TP53        | R248Q                | Missense_Mutation   | LOF (likely)      | 1         |
| TP53        | R273H                | Missense_Mutation   | LOF (likely)      | 1         |
| TP53        | R282P                | Missense_Mutation   | LOF (likely)      | 1         |
| TP53        | R282W                | Missense_Mutation   | LOF (likely)      | 1         |
| TP53        | Y234C                | Missense_Mutation   | LOF (likely)      | 1         |
| TP53        | Y234D                | Missense_Mutation   | LOF (likely)      | 1         |
| TP53        | P27*                 | Nonsense_Mutation   | LOF (likely)      | 1         |
| TP53        | V203*                | Nonsense_Mutation   | LOF (likely)      | 1         |
| TP53        | V73*                 | Nonsense_Mutation   | LOF (likely)      | 1         |
| TP53        | splice site 672+1G>T | Splice site variant | Unknown           | 1         |

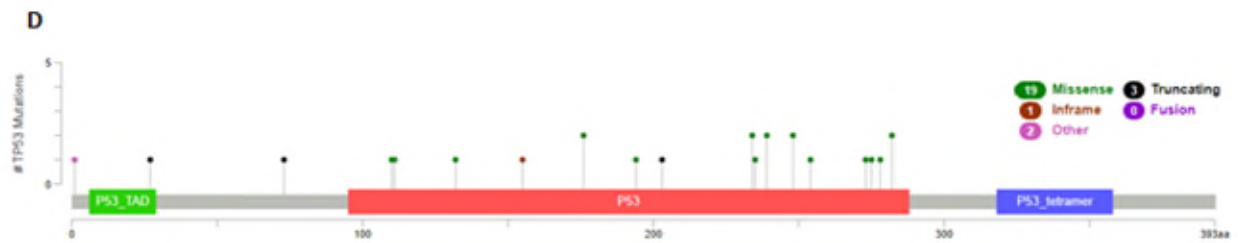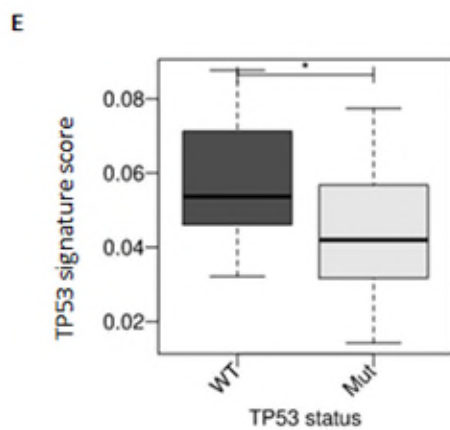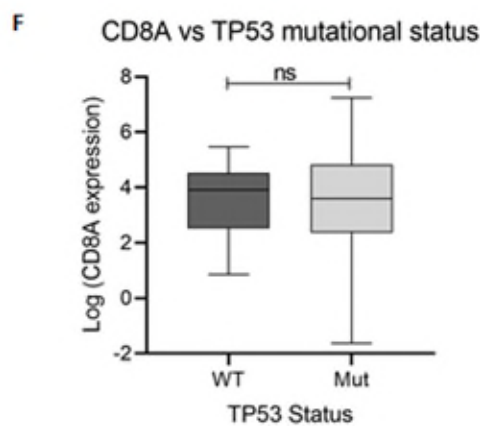

Del, deletion; LOF, loss of function; Mut, mutant; WT, wildtype.
